# Supplementary material for: Longitudinal analysis reveals age-related changes in the T cell receptor repertoire of human T cell subsets
Source: JCI journal article supplement (doi:10.1172/jci158122), 2022-06-16
Supplement: sd1 [file 1]

## Age-related changes in the TCR repertoire of human naïve and memory CD4<sup>+</sup> and CD8<sup>+</sup> T cells by longitudinal analysis

Xiaoping Sun<sup>1\*</sup>, Thomas Nguyen<sup>1\*</sup>, Achouak Achour<sup>1\*</sup>, Annette Ko<sup>1</sup>, Jeffrey Cifello<sup>1</sup>, Chen Ling<sup>1</sup>, Jay Sharma<sup>1</sup>, Toyoko Hiroi<sup>1</sup>, Yongqing Zhang<sup>2</sup>, Chee W. Chia<sup>3</sup>, William Wood, III<sup>2</sup>, Wells W. Wu<sup>4</sup>, Linda Zukley<sup>5</sup>, Je-Nie Phue<sup>4</sup>, Kevin G. Becker<sup>2</sup>, Rong-Fong Shen<sup>4</sup>, Luigi Ferrucci<sup>5</sup>, and Nan-ping Weng<sup>1\*\*\*</sup>

<sup>1</sup>Laboratory of Molecular Biology and Immunology, National Institute on Aging, NIH, Baltimore, MD, USA

<sup>2</sup>Gene expression and Genomics Unit, Laboratory of Genetics and Genomics, National Institute on Aging, NIH, Baltimore, MD, USA

<sup>3</sup>Laboratory of Clinical Investigation, National Institute on Aging, NIH, Baltimore, MD, USA

<sup>4</sup>Facility for Biotechnology Resources, CBER, Food and Drug Administration, Silver Spring, MD, USA

<sup>5</sup>Translational Gerontology Branch, National Institute on Aging, NIH, Baltimore, MD, USA

Supplemental Figure S1: Changes of T cell counts in blood and memory T cell subsets with age.

Supplemental Figure S2: Variations of TCR $\alpha$  and TCR $\beta$  richness of naïve and memory CD4<sup>+</sup> and CD8<sup>+</sup> T cells isolated at the same time.

Supplemental Figure S3: CDR3 lengths of TCR $\alpha$  and TCR $\beta$  in total, naïve and memory CD4<sup>+</sup> and CD8<sup>+</sup> T cells in study subject.

Supplemental Figure S4: Development of equations to predict paired  $\alpha\beta$  TCR richness based on the separated TCR $\alpha$  and TCR $\beta$  sequences.

Supplemental Table S1: Demographics of study subjects and their blood T cell subset counts

Supplemental Table S2: Summary of  $\alpha\beta$  TCR repertoire of CD4<sup>+</sup> and CD8<sup>+</sup> T cells

Supplemental Table S3: Summary of  $\alpha\beta$  TCR repertoire of naïve and memory CD4<sup>+</sup> and CD8<sup>+</sup> T cells

Supplemental Table S4: Overlap of TCR sequences between two visits

Supplemental Table S5: Overlap Percentages of TCR sequences between naïve and memory CD4<sup>+</sup> and CD8<sup>+</sup> T cells

Supplemental Table S6: Overlap of TCR sequences between CD4<sup>+</sup> and CD8<sup>+</sup> T cells

Supplemental Table S7: Oligos used in TCR library construction and sequencing

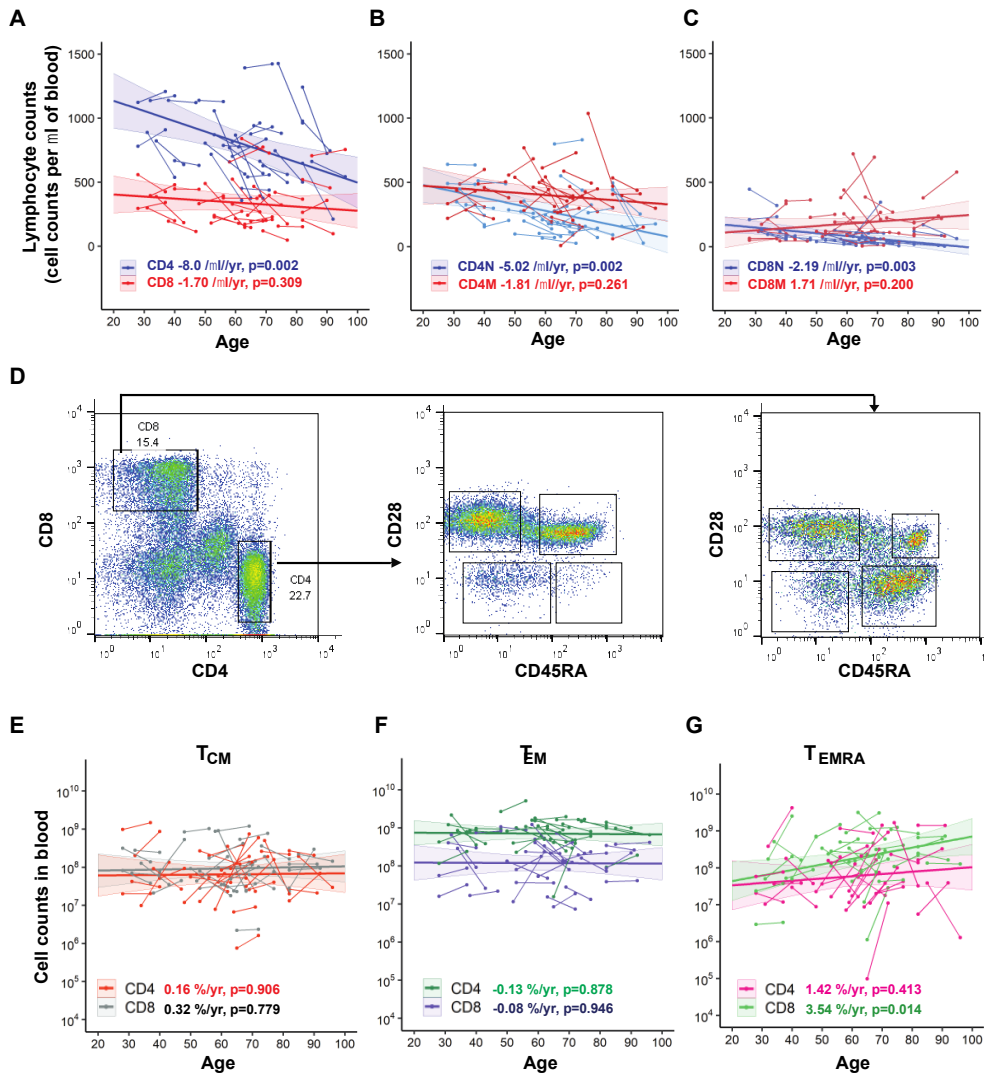

**Supplemental Figure 1: Changes of T cell counts in blood and memory T cell subsets with age.** A. Changes in CD4<sup>+</sup> and CD8<sup>+</sup> T cell counts in blood with age. Cell counts were calculated based on 1) lymphocyte counts per microliter of blood and 2) percentage of CD4<sup>+</sup> and CD8<sup>+</sup> T cells and naïve (CD45RA<sup>+</sup>CD28<sup>+</sup>) and memory cells in lymphocytes, calculated from flow cytometry. D. Gating of CD4<sup>+</sup> and CD8<sup>+</sup> T memory T cell subsets:  $T_{CM}$ (CD45RA<sup>-</sup>CD28<sup>+</sup>),  $T_{EM}$ (CD45RA<sup>-</sup>CD28<sup>-</sup>), and  $T_{EMRA}$ (CD45RA<sup>+</sup>CD28<sup>-</sup>). E-G, Numbers of CD4<sup>+</sup> and CD8<sup>+</sup>  $T_{CM}$ ,  $T_{EM}$ , and  $T_{EMRA}$  cells in blood at each visit and their change with age.

**A**

Multiple aliquots of naive and memory  
CD4 and CD8 T cells from same person  
(n=3)

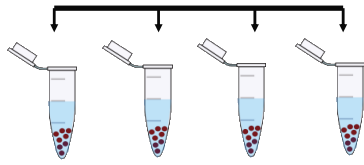

2-4 vials per type of cells/subject,  
4-7 samples per subset

Determine the average SD of  
TCR repertoire measurements

**B**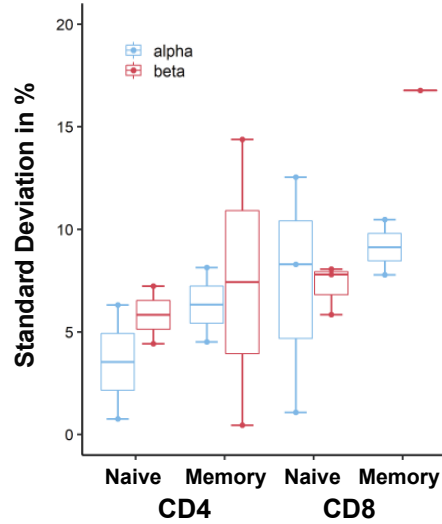

**Supplemental Figure 2: Variations of TCR $\alpha$  and TCR $\beta$  richness of naïve and memory CD4<sup>+</sup> and CD8<sup>+</sup> T cells isolated at the same time.** A. Experimental plan. Naïve and memory CD4<sup>+</sup> and CD8<sup>+</sup> T cells were isolated from blood (three healthy adults) by cell sort and equal number of sorted cells ( $0.5-1 \times 10^6$ ) were aliquot in 3-4 tubes. TCR $\alpha$  and TCR $\beta$  sequences in each tube were independently measured and then predicted to  $10^7$  by DivE method. B. Standard deviations of projected richness of TCR $\alpha$  and TCR $\beta$  are presented as percentages.

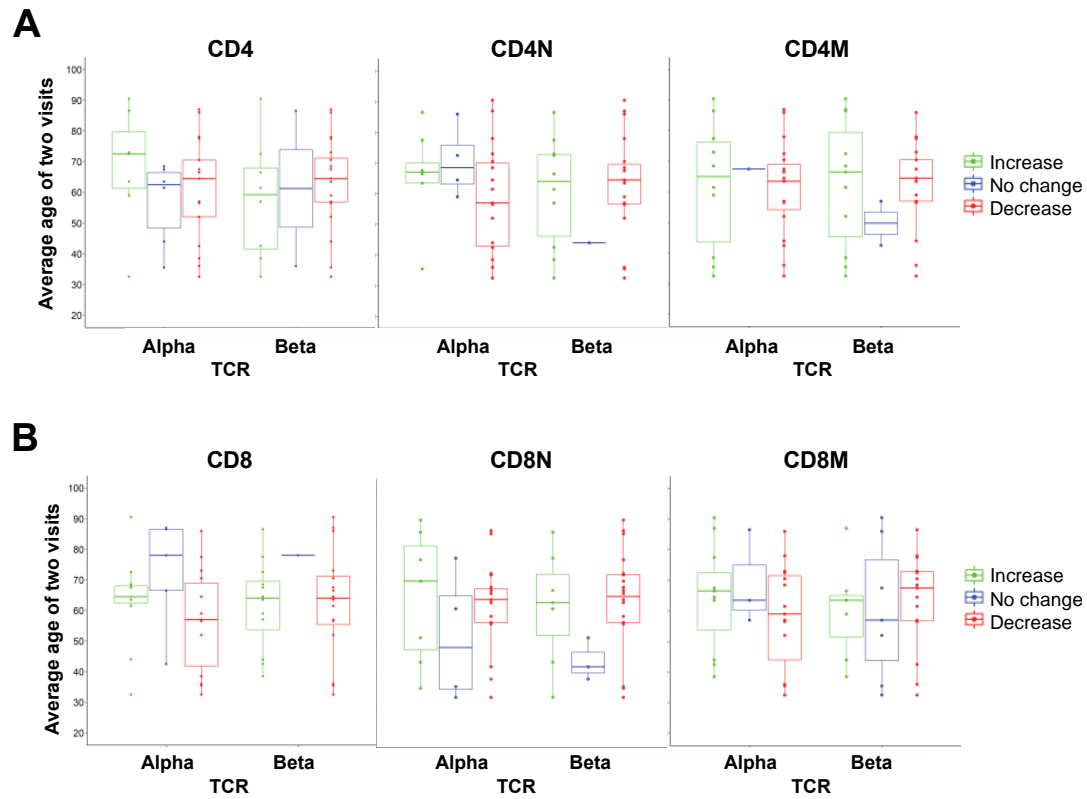

**Supplemental Figure 3: Average age of three groups of TCR $\alpha$  and TCR $\beta$  richness changes in total, naïve and memory CD4<sup>+</sup> and CD8<sup>+</sup> T cells. A. Box-Whisker plot of average age of three groups (decrease, no change, and increase) of richness changes with age in total, naïve (N), and memory (M) CD4<sup>+</sup> T cells.. B. Box-Whisker plot of average age of three groups of richness changes with age in total, naïve (N), and memory (M) CD8<sup>+</sup> T cells.**

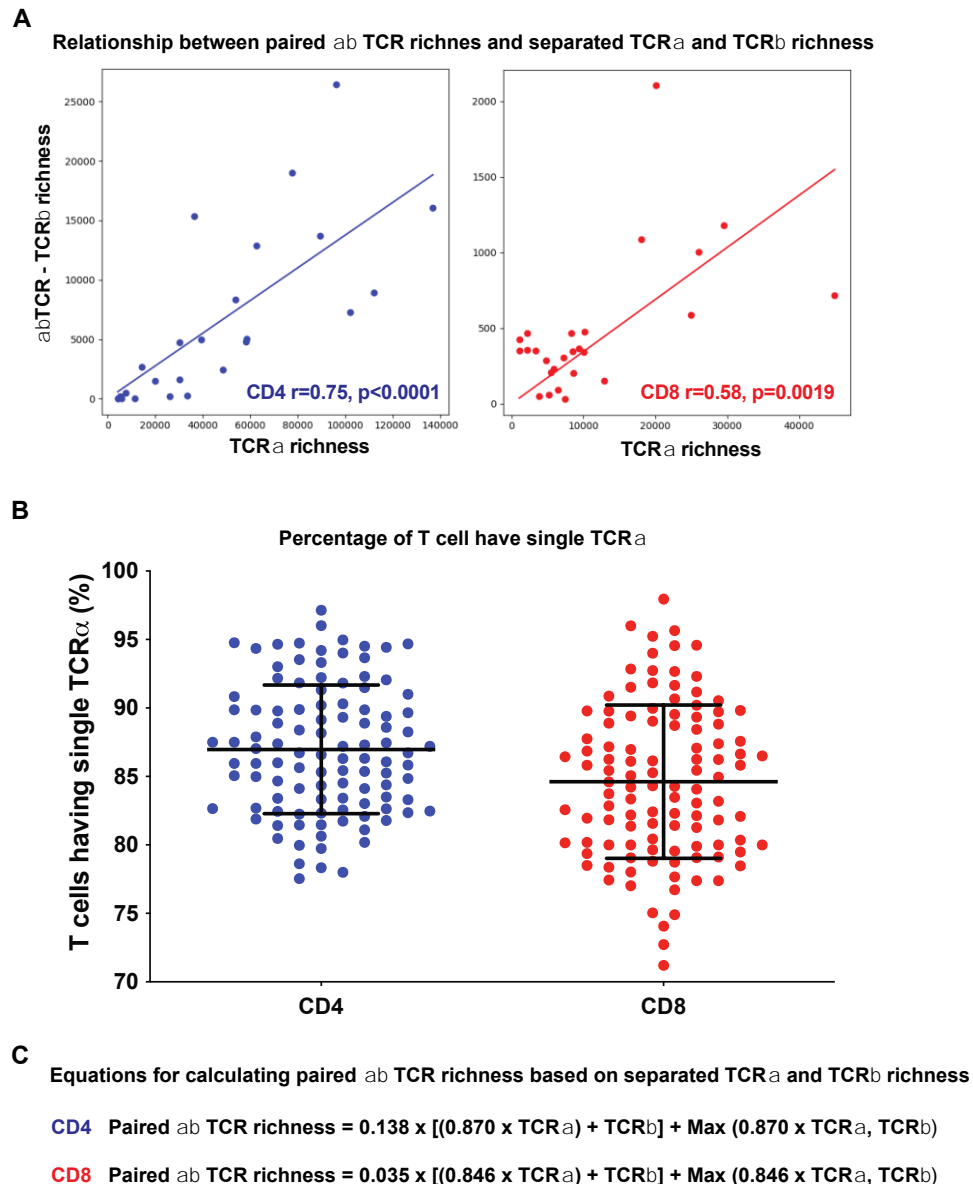

**Figure 4: Development of equations to predict paired  $\alpha\beta$  TCR richness based on the unpaired TCR $\alpha$  and TCR $\beta$  sequences.** A. Linear relationship between 1) the paired  $\alpha\beta$  TCR richnesses minus the maximum unpaired richnesses and 2) the sum of the unpaired richnesses, TCR $\alpha$  and TCR $\beta$ , from  $\alpha\beta$  TCR data of single cell analysis. 745,182 and 158,305  $\alpha\beta$  TCRs from CD4<sup>+</sup> and CD8<sup>+</sup> T cells, respectively, were used in this analysis. B. Percentage of T cells with a single TCR $\alpha$ . The values are derived via the analyses of 108 and 111 single T cell samples for CD4<sup>+</sup> and CD8<sup>+</sup>, respectively, using published data with secondary TCR $\alpha$  information (see method for details). C. Equations for calculating paired  $\alpha\beta$  TCR richness based on unpaired TCR $\alpha$  and TCR $\beta$  richness of CD4<sup>+</sup> and CD8<sup>+</sup> T cells. TCR $\alpha$  richness is preceded by a factor indicating average contribution to TCR $\alpha$  richness by primary TCR $\alpha$ 's, compensating contributions to TCR $\alpha$  richness by secondary TCR $\alpha$ 's in bulk-sequencing.
